# Supplementary material for: iPSC reprogramming-mediated aneuploidy correction in autosomal trisomy syndromes
Source: PubMed Central journal article supplement (PMC8912248; doi:10.1371/journal.pone.0264965), 2022-03-10

**A.**

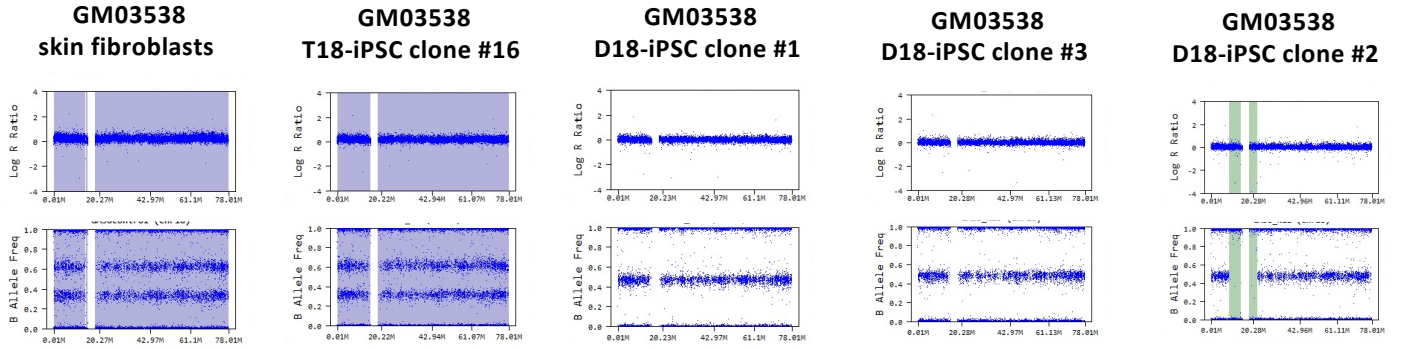

**B.**

**GM03538 (T18) skin fibroblasts**

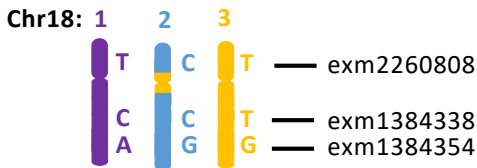

**Cell reprogramming**

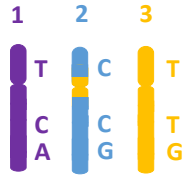

**iPSC 28 clones**

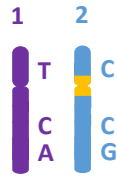

**iPSC 1 clone**

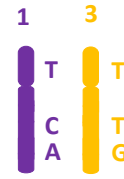

**iPSC 2 clones**

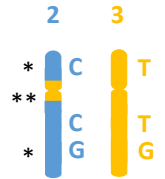

**iPSC 1 clone**

**skin fibroblasts  
(Chr 18: 1/2/3)**

**T18-iPSC clone #16  
(Chr18: 1/2/3)**

**D18-iPSC clone #1  
(Chr18: 1/2)**

**D18-iPSC clone #3  
(Chr18: 1/3)**

**D18-iPSC clone #2  
(Chr18: 2/3)**

exm220808 [T/C/T]

CA A A A G C C H G G T G G

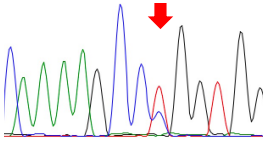

exm220808 [T/C/T]

CA A A A G C C H G G T G G

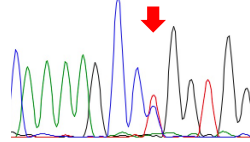

exm220808 [T/C]

C N A A A G C C H G G T G G

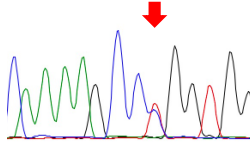

exm220808 [T/T]

CA A A A G C C T G G T G G

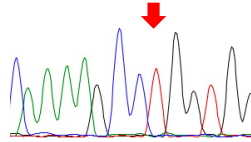

exm220808 [C/T]

C N A A A G C C N G G T G G

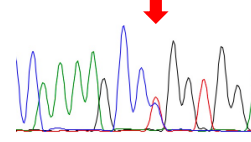

exm1384338 [C/C/T]

G A A T G G A N G G T C T T

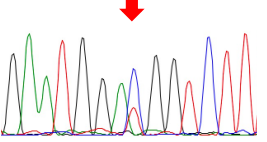

exm1384338 [C/C/T]

A A T G G A N G G T C T T

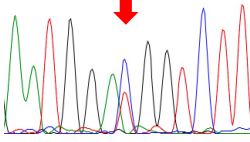

exm1384338 [C/C]

i A A T G G A C G G T C T T

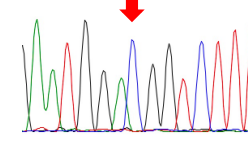

exm1384338 [C/T]

j A A T G G A N G G T C T T

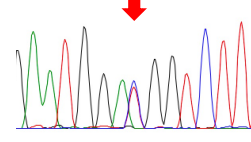

exm1384338 [C/T]

G A A T G G A N G G T C T T

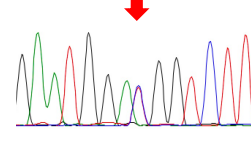

exm13843354 [A/G/G]

A A A R A A C T T G C C

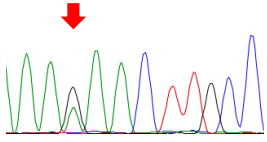

exm13843354 [A/G/G]

A A A R A A C T T G C C

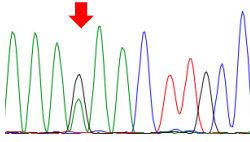

exm13843354 [A/G]

A A A R A A C T T G C C

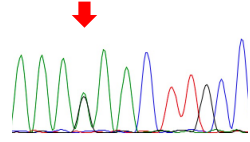

exm13843354 [A/G]

A A A R A A C T T G C C

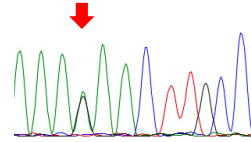

exm13843354 [G/G]

A A A G A A C T T G C C

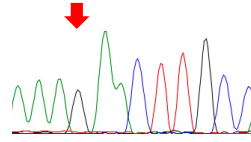

Supplement: pone.0264965.s008.pdf [file pone.0264965.s008.pdf]
