# Supplementary material for: iPSC reprogramming-mediated aneuploidy correction in autosomal trisomy syndromes
Source: PubMed Central journal article supplement (PMC8912248; doi:10.1371/journal.pone.0264965), 2022-03-10
Supplement: pone.0264965.s002.pdf [file pone.0264965.s002.pdf]

A.

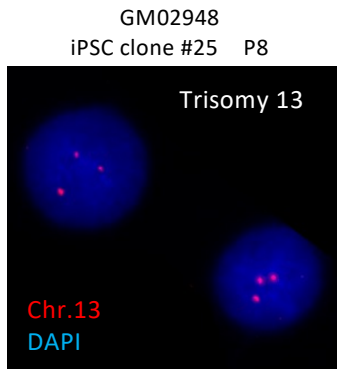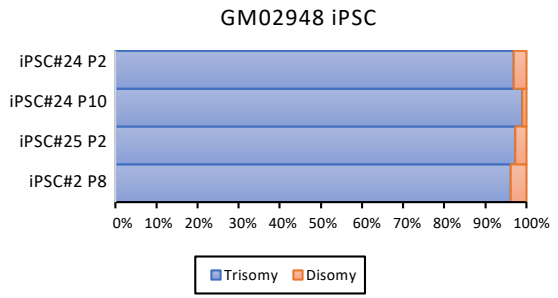

B.

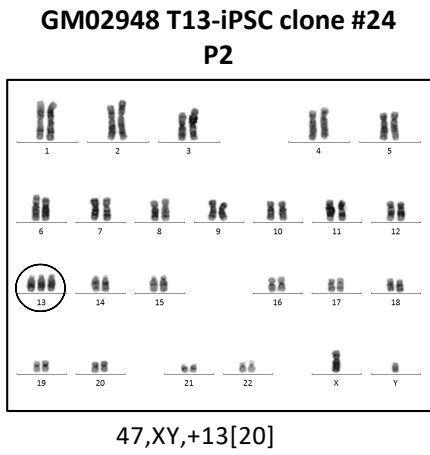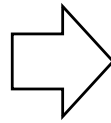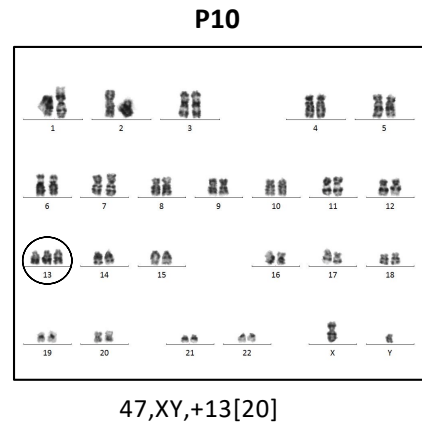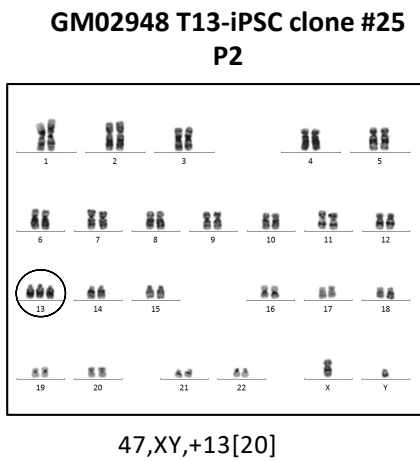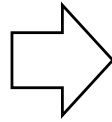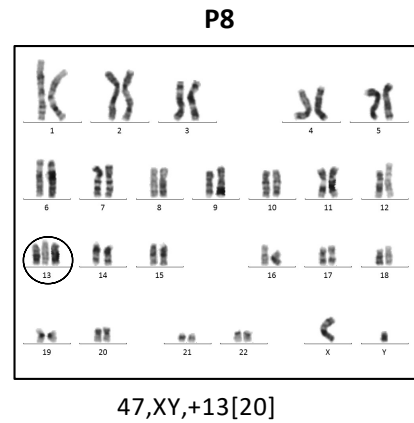

Supporting Figure 2
