# Supplementary material for: iPSC reprogramming-mediated aneuploidy correction in autosomal trisomy syndromes
Source: PubMed Central journal article supplement (PMC8912248; doi:10.1371/journal.pone.0264965), 2022-03-10

A.

Disomy 13 (GM02948 iPSC#21)  
and  
Trisomy 13 (GM02948 iPSC#27)

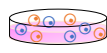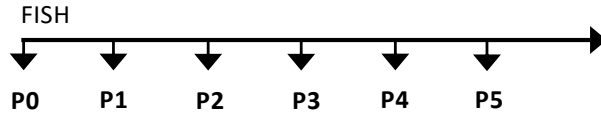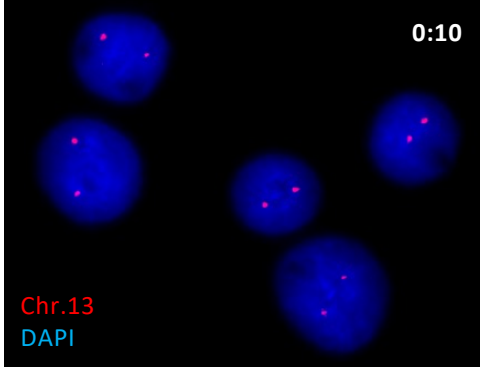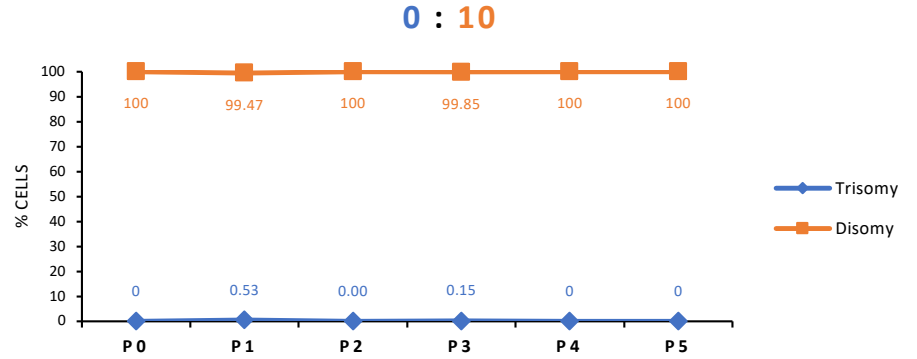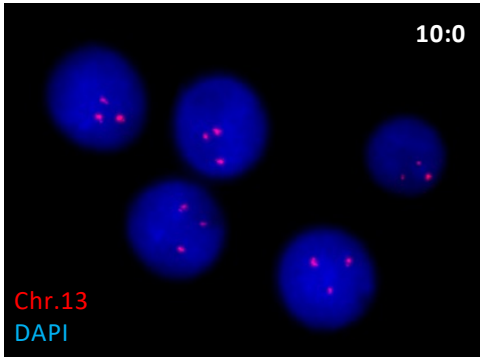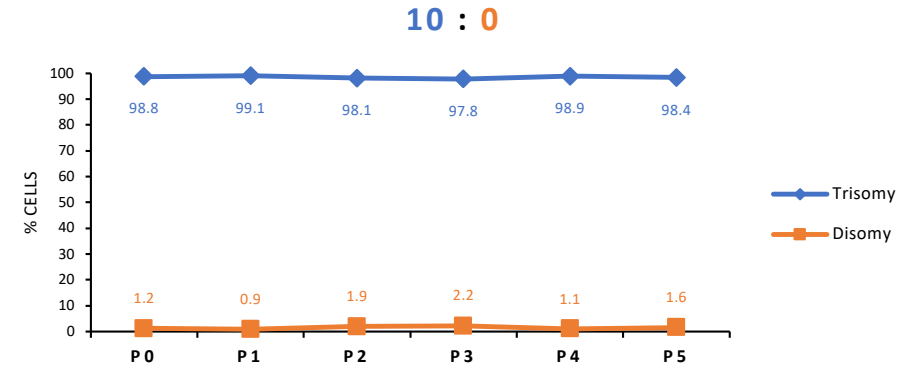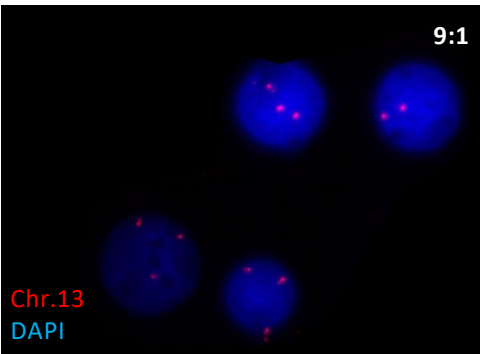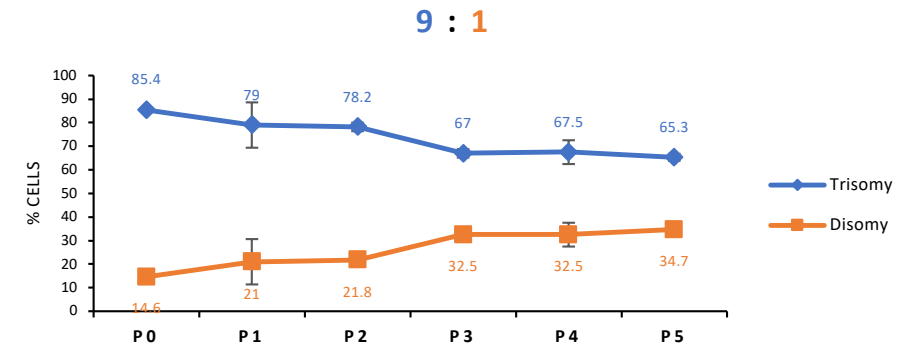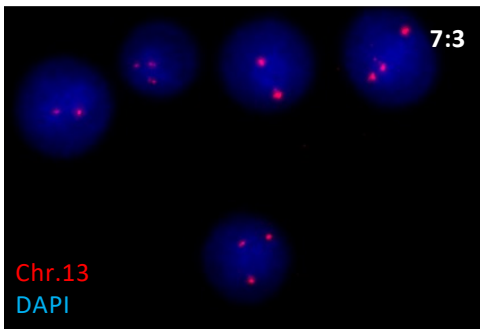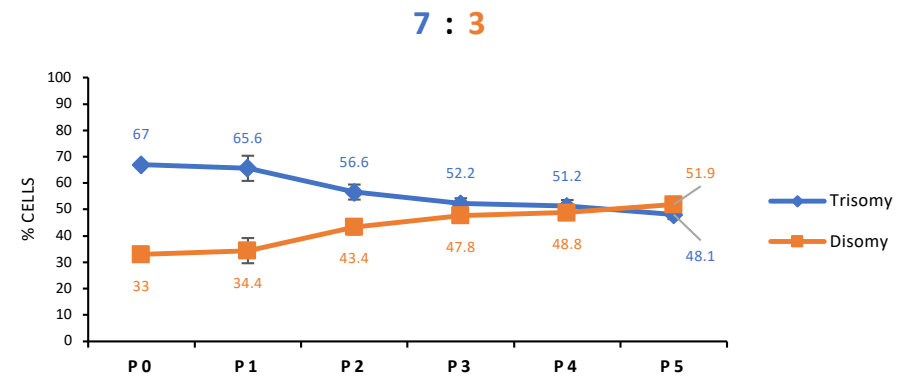

Supplement: pone.0264965.s003.pdf [file pone.0264965.s003.pdf]
