# Supplementary material for: iPSC reprogramming-mediated aneuploidy correction in autosomal trisomy syndromes
Source: PubMed Central journal article supplement (PMC8912248; doi:10.1371/journal.pone.0264965), 2022-03-10

A.

**GM03330**

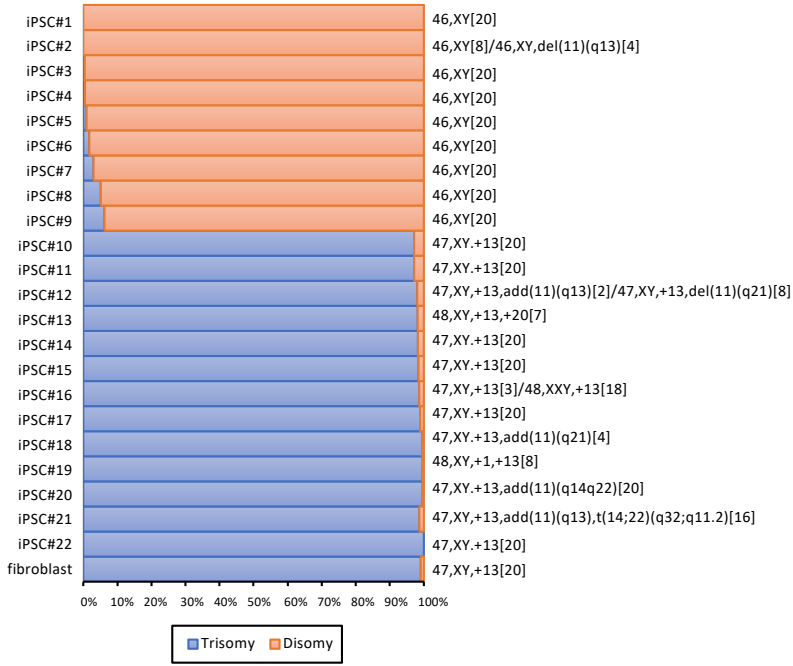

B.

**GM00526**

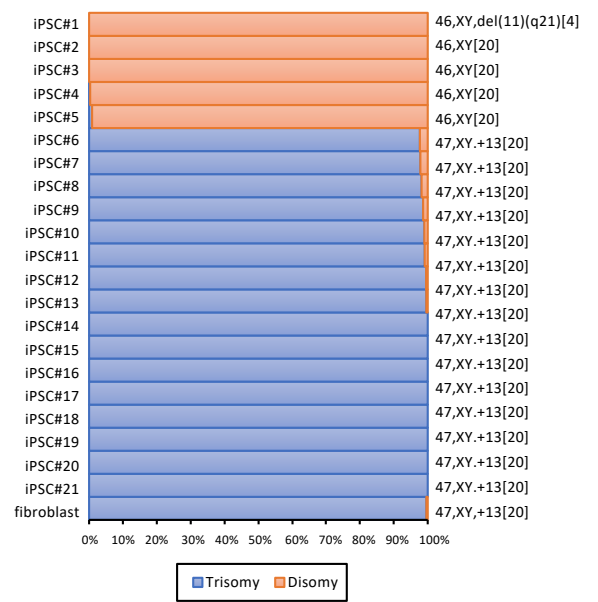

C.

**GM04616**

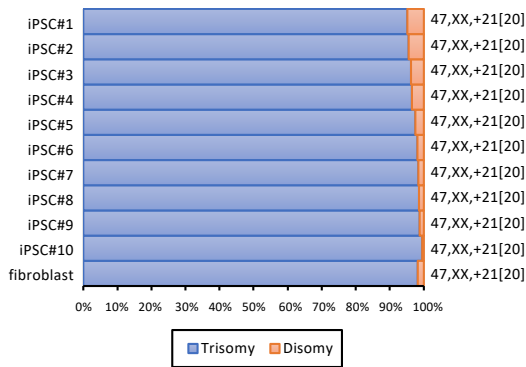

D.

**GM00734**

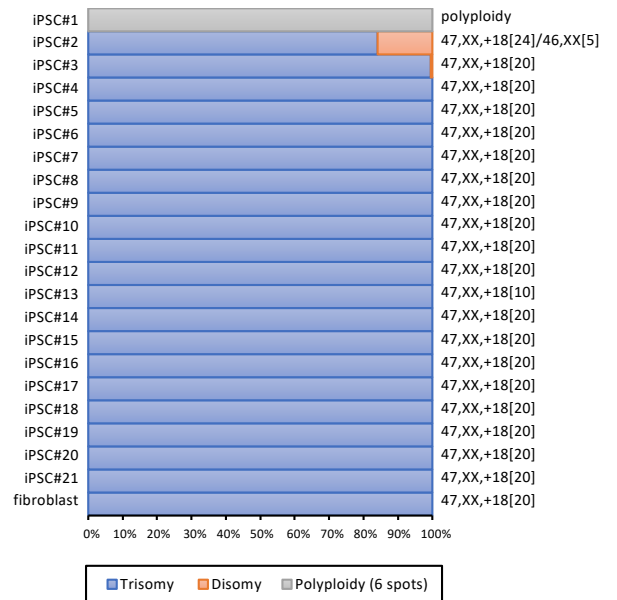

Supplement: pone.0264965.s004.pdf [file pone.0264965.s004.pdf]
