# Supplementary material for: iPSC reprogramming-mediated aneuploidy correction in autosomal trisomy syndromes
Source: PubMed Central journal article supplement (PMC8912248; doi:10.1371/journal.pone.0264965), 2022-03-10

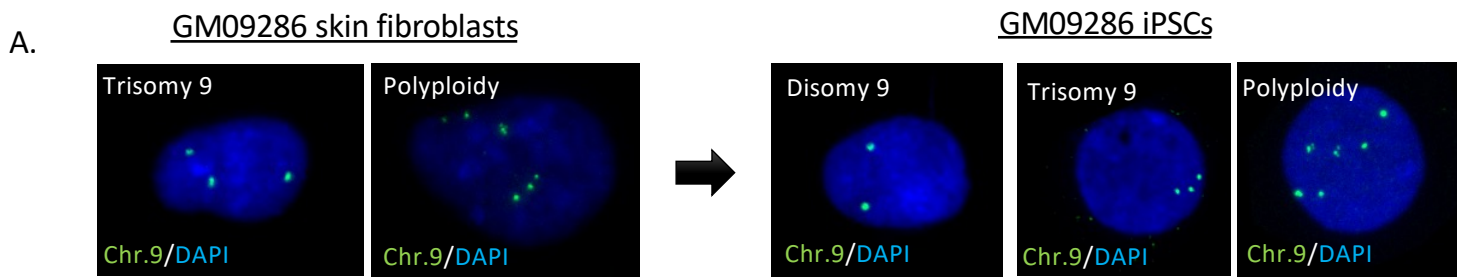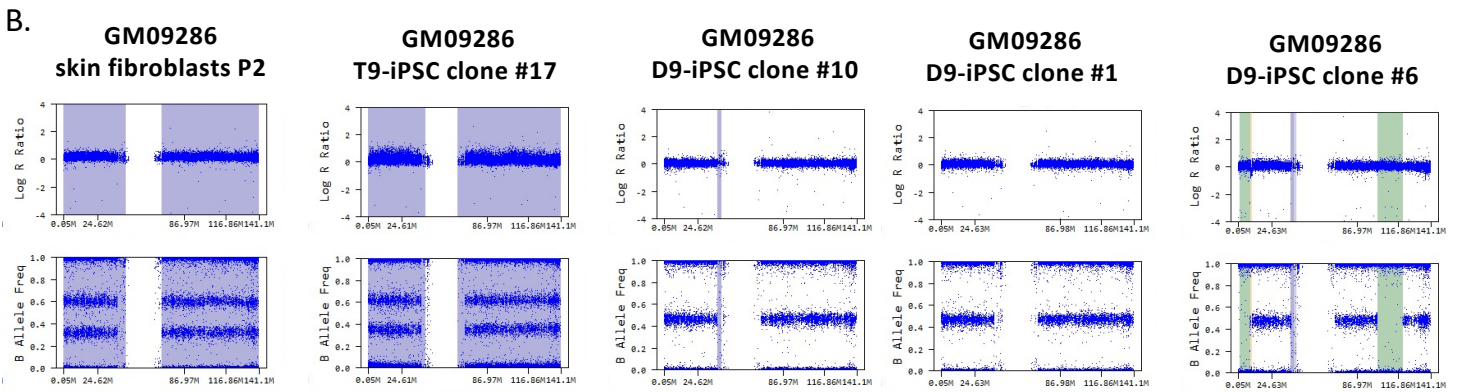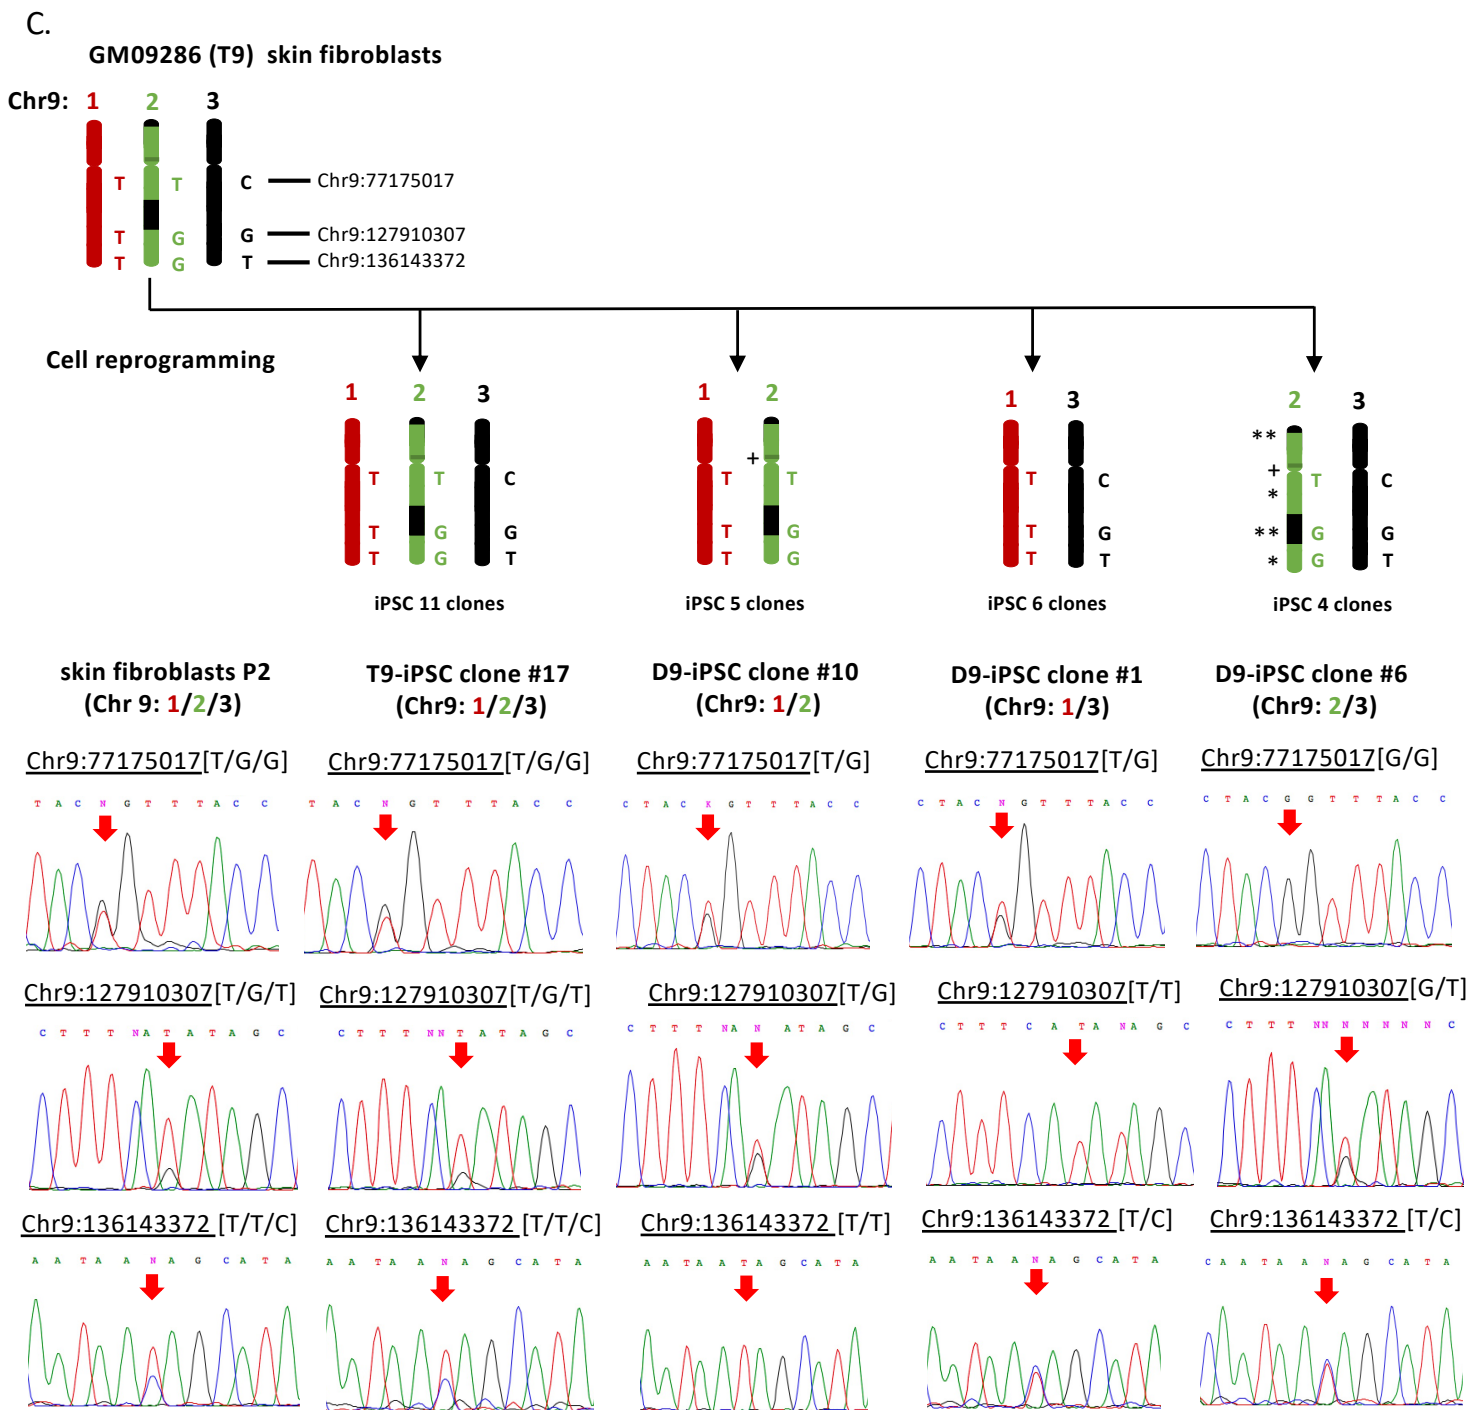

Supplement: pone.0264965.s009.pdf [file pone.0264965.s009.pdf]
